# Supplementary material
Source: PubMed Central journal article supplement (PMC6057820)
Supplement: NIHMS941734-supplement-2.pdf [file NIHMS941734-supplement-2.pdf]

**Item S1. Detailed methods.**

***Marginal Structural Models***

In our marginal structural analysis, we categorized SBP and DBP changes as: greater than 1 mm Hg decrease, -1 to 1 mm Hg change, 1-5 mm Hg change, 5-10 mm Hg, and > 10 mm Hg change in SBP or DBP per five year period. We used year 0 eGFR based on cystatin as the lagged measure of renal function at year 10. In addition, the time-updated exposures were categorized, to facilitate estimation of the inverse probability of treatment weights (IPTWs) using multinomial models. This approach is illustrated below. In the marginal structural models, covariates in Model 3 were used in estimation of the IPTWs.

| <b>Year</b>      | <b>0</b> | <b>2</b> | <b>5</b> | <b>7</b> | <b>10</b> | <b>15</b> | <b>20</b> |
|------------------|----------|----------|----------|----------|-----------|-----------|-----------|
| BP ascertainment | X        | X        | X        | X        | X         | X         | X         |
| Cystatin C       | --       |          | --       |          | X         | X         | X         |

*Sensitivity analysis*

**Marginal structural Model**

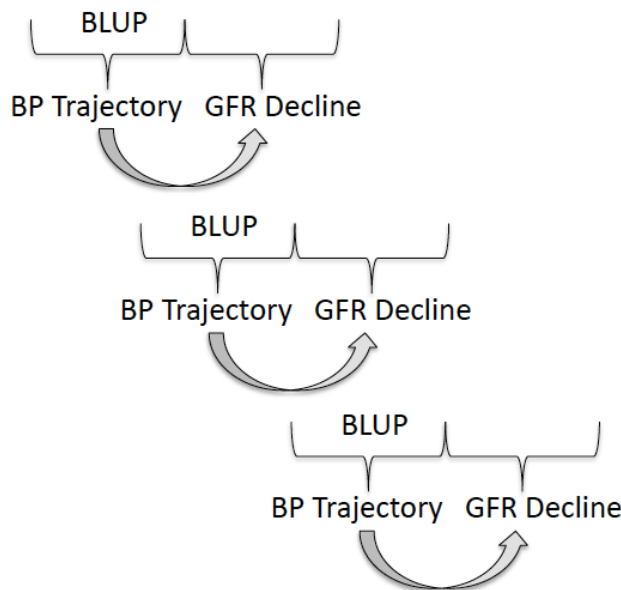

\*In this approach, BP between years 0-5 will predict lagged eGFR decline between years 5-10.

The institutional review board at University of California San Francisco approved the conduct of this secondary data analysis (IRB 12-08845).
