# Supplementary material
Source: PubMed Central journal article supplement (PMC6057820)
Supplement: NIHMS941734-supplement-3.pdf [file NIHMS941734-supplement-3.pdf]

**Table S1.** Renal function decline (mL/min/1.73 m<sup>2</sup>/year (95% CI)) by tertiles of SBP year 0-10 BLUP and SBP at year 10.

|                                    | <b>SBP BLUP</b><br>-5.56 to -0.87<br>mmHg/5 years | <b>SBP BLUP</b><br>-0.87 to 0.54<br>mm Hg/5 years | <b>SBP BLUP</b><br>0.54 to 14<br>mm Hg/5 years |
|------------------------------------|---------------------------------------------------|---------------------------------------------------|------------------------------------------------|
| <b>Year 10 SBP</b><br>74-104 mmHg  | N=763<br>-0.76<br>(-0.84 to -0.67)                | N=388<br>-0.82<br>(-0.94, -0.71)                  | N=89<br>-0.99<br>(-1.22, -0.76)                |
| <b>Year 10 SBP</b><br>105-114 mmHg | N=331<br>-0.82<br>(-0.95, -0.70)                  | N=452<br>-0.85<br>(-0.96,-0.74)                   | N=344<br>-1.00<br>(-1.13, -0.89)               |
| <b>Year 10 SBP</b><br>115-212 mmHg | N=48<br>-1.00<br>(-1.32, -0.68)                   | N=302<br>-0.81<br>(-0.94,-0.68)                   | N=708<br>-1.14<br>(-1.23, -1.09)               |
