# Supplementary material
Source: PubMed Central journal article supplement (PMC6057820)
Supplement: NIHMS941734-supplement-4.pdf [file NIHMS941734-supplement-4.pdf]

**Table S2.** Renal function decline (mL/min/1.73 m<sup>2</sup>/year (95% CI)) by tertiles of DBP year 0-10 BLUP and DBP at year 10.

|                                   | <b>DBP BLUP</b><br>-1.94 to 1.20<br>mmHg/5 years | <b>DBP BLUP</b><br>1.20-2.54<br>mm Hg/5 years | <b>DBP BLUP</b><br>2.54-7.17<br>mm Hg/5 years |
|-----------------------------------|--------------------------------------------------|-----------------------------------------------|-----------------------------------------------|
| <b>Year 10 DBP</b><br>40-68 mmHg  | N=757<br>-0.78<br>(-0.86, -0.70)                 | N=352<br>-0.85<br>(-0.97, -0.73)              | N=118<br>-0.97<br>(-1.17, -0.76)              |
| <b>Year 10 DBP</b><br>69-76 mmHg  | N=322<br>-0.76<br>(-0.89, -0.63)                 | N=442<br>-0.87<br>(-0.98, -0.76)              | N=356<br>-0.92<br>(-1.04, -0.80)              |
| <b>Year 10 DBP</b><br>77-120 mmHg | N=63<br>-0.56<br>(-0.86, -0.26)                  | N=348<br>-1.05<br>(-1.17, -0.93)              | N=667<br>-1.08<br>(-1.18, -1.00)              |
