# Supplementary material
Source: PubMed Central journal article supplement (PMC6057820)

Fig S1. Flow diagram of cohort derivation

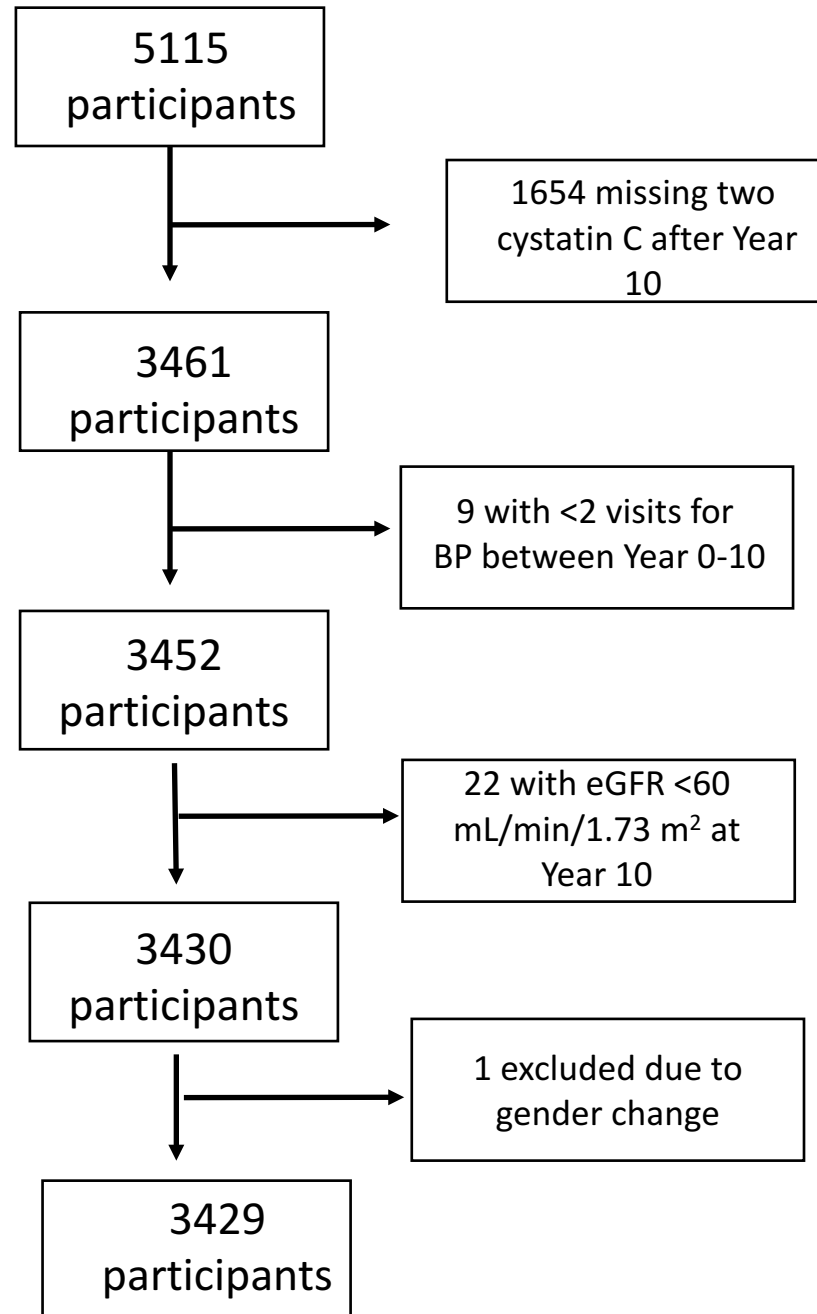

Supplement: NIHMS941734-supplement-1.pdf [file NIHMS941734-supplement-1.pdf]
